# Supplementary material for: The SPF27 Homologue Num1 Connects Splicing and Kinesin 1-Dependent Cytoplasmic Trafficking in Ustilago maydis
Source: PLoS Genet. 2014 Jan 2;10(1):e1004046. doi: 10.1371/journal.pgen.1004046 (PMC3879195; doi:10.1371/journal.pgen.1004046)
Supplement: Table S4 — Expression of b-target genes in AB31 compared to AB31Δrbf1 and AB31Δnum1. (XLSX) [file pgen.1004046.s031.xlsx]

## Sheet: Sheet1
	Table S4: Expression of b-tagret genes in AB31 compared to AB31∆rbf1 and AB31∆num1.
MUMDB1	probe set2	gene3	MUMDB annotation4	AB31 3h5		AB31Drbf1 3h5		AB31 5h5		AB31Drbf1 5h5		AB31 12h5		AB31Drbf1 12h5			rbf1 ind 5h5		regulation6	bbs7	DESeq log2Fold Change ∆num1 vs WT8	fold change ∆num1 vs WT9	AB31 normalized mean10	STDV11	AB31∆num1 normalized mean12	STDV11
um03172	W11um240G_at	rbf1	related to Zinc finger protein	297.386	*	1.15		191.539	*	-2.35		103.482	*	-2.17			998.44	*		3	0.147156	1.10738	140.641	2.05022	155.88	5.53811	1.10738	1.10738
um11413	W20um161G_at		putative protein	26.137	*	27.38	*	19.6722	*	22.37	*	23.0955	*	30.74	*		-1.05		only b	1	0.355119	1.27909	373.768	11.1007	501.152	20.4784	1.27909	1.27909
um11190	W156um005G_at		putative protein	41.0447	*	40.1		42.3659	*	38.02	*	125.403	*	69.34	*		-1.12			1	0.245226	1.18528	85.5922	3.49303	107.95	1.14791	1.18528	1.18528
um02438	C115um033G_at	clp1	related to clp1, essential for A-regulated sexual development	79.8252	*	81.08		38.6664	*	41.6	*	59.2438	*	50.71	*		1.04			2	0.126787	1.09186	138.901	4.35212	154.004	2.30898	1.09186	1.09186
um03911	C55um002G_at		related to RIM2 - Protein of the mitochondrial carrier family	4.28407	*	4.24		3.78909	*	3.25	*	2.30956	*	1.86			-1.68			1	0.0662329	1.04698	41.433	0.209443	45.1674	0.658317	1.04698	1.04698
um04214	C135um027G_at	pyr6	orotidine 5`-phosphate decarboxylase	3.61044	*	3.59		4.05302	*	3.63	*	2.82161	*	1.67			-1.06			1	0.344584	1.26978	146.267	2.49859	188.839	3.10075	1.26978	1.26978
um04275	W35um156G_at		related to DNA mismatch repair protein	3.1718	*	3.67	*	3.95193	*	4.08	*	1.82401		1.49			-1.4			2	0.125816	1.09112	38.942	0.420134	43.7663	0.822265	1.09112	1.09112
um11606	W20um280G_at		putative protein	3.53399	*	3.79	*	4.86375	*	3.41	*	4.64899	*	1.2			-1.14			1	-0.0303612	-1.02127	115.229	2.60623	111.42	12.3502	0.979175	-1.02127
um03541	W41um013G_at		related to Meiotic expression upregulated protein 26	2.36113		3.63	*	3.88915	*	5.48	*	4.27094		3.99	*		1.33			1	2.95838	7.77252	4.58241	0.104632	35.836	1.77894	7.77252	7.77252
um04654	W57um112G_at		related to U2 snRNP protein A`	2.84926	*	3.2	*	2.56461	*	2.77	*	1.41878		1.49			-1.2			3	0.243664	1.184	36.0602	0.929596	44.9471	0.620536	1.184	1.184
um02104.2	C5um012G_at		probable Regulator of G-Protein Signaling Protein	2.50091		2.58	*	2.79763	*	3.36	*	1.8903		-1.21			1.06			1	-0.0532788	-1.03762	8.51374	0.723164	8.20287	0.719755	0.963744	-1.03762
um01234	C230um010G_at		putative protein	43.8169	*	12.77		57.7517	*	11.29	*	46.9877	*	2.57	*		9.06	*	b or Rbf1	1	0.035592	1.02498	155.417	3.25932	161.353	5.01523	1.02498	1.02498
um01262	W85um010G_at	polx	DNA polymerase X - putative	30.0695	*	9.64		50.9154	*	15.95	*	39.0864	*	5.68	*		32.49	*		1	-0.125824	-1.09113	179.091	3.60086	165.749	7.96416	0.91648	-1.09113
1) Genes and annotations are derived from MUMDB (http://mips.gsf.de/genre/proj/ustilago/)
2) Probe Set on Affymetrix custom array UstilagoA defines region for detection of corresponding genes (http://mips.gsf.de/genre/proj/ustilago/)
3) Gene name as described in literature
4) Annotation according to MUMDB
5) Fold induction/repression relative to respective control strain, bold/*=significant (Heimel et al, 2010, PLoS Pathog. doi: 10.1371/journal.ppat.1001035)
6) Regulation in dependency of b and rbf1: only b= only b-regulated not affected b rbf1 ; b or rbf1= regulated by b or rbf1 (both are sufficient for regulation), (Heimel et al, 2010, PLoS Pathog. doi: 10.1371/journal.ppat.1001035)
7) Number of b-binding sites in promoter region 2 kb upstream of respective gene (Heimel et al, 2010, PLoS Pathog. doi: 10.1371/journal.ppat.1001035)
8) DESeq log2 fold change in expression between ∆num1 and wt
9) fold change in expression between ∆num1 and wt
10) Expression in wt, mean of three independent samples, in fragments per kilobase per million
11) Standard deviation of three independent samples
12) Expression in ∆num1, mean of three independent samples, in fragments per kilobase per million
